# Supplementary material for: Probabilistic risk assessment of AgNPs for human health through dietary consumptions of crops
Source: Royal Society of Chemistry journal article supplement (doi:10.1039/d2en00149g), 2022-01-01
Supplement: d2en00149g1.pdf [file d2en00149g1.pdf]

### Supplementary information

Data “% of area equipped for irrigation by surface water” provided by AQUASTAT in given year were calculated as:

$$[\% \text{ of area equipped for irrigation by surface water}] = 100 * [\text{Area equipped for irrigation by surface water}] / [\text{Area equipped for irrigation: total}]$$

Data “% sprinkler irrigation intensity out of total irrigation” were calculated as:

$$[\% \text{ sprinkler irrigation intensity out of total irrigation}] = 100 * [\text{Area equipped for full control irrigation: sprinkler irrigation}] / [\text{total agricultural water managed area}]$$

These two groups of data in the same period from 2013 to 2017 were collected for EU28. However, few abnormal results were higher than 100%. This is because of the incoherence of data collection time between two parameters in the calculation as shown in Table S. Solutions and corresponding values are also shown in Table S1.

Table S1. Discrepancies and solutions of irrigation related parameters

| National data information |                                                                 | reference                                     | solution and reference                  | value                                                                                                                                 |
|---------------------------|-----------------------------------------------------------------|-----------------------------------------------|-----------------------------------------|---------------------------------------------------------------------------------------------------------------------------------------|
| Poland                    | % of area equipped for irrigation by surface water              |                                               |                                         |                                                                                                                                       |
|                           | total area equipped for irrigation                              | area equipped for irrigation by surface water |                                         |                                                                                                                                       |
| value (1000ha)            | 75.81                                                           | 104.1                                         | Irrigation area sheet-Poland, AQUASTAT  | calculate surface water percentage out of the sum of total areas for all the irrigation water sources (surface water and groundwater) |
| data collection time      | 2013                                                            | 2007                                          | 2019                                    | 102.7/(102.7+11.6)                                                                                                                    |
| Latvia                    | % of area equipped for irrigation by surface water              |                                               |                                         |                                                                                                                                       |
|                           | total area equipped for irrigation                              | area equipped for irrigation by surface water |                                         |                                                                                                                                       |
| value (1000ha)            | 0.63                                                            | 0.77                                          | Irrigation area sheet-Latvia, AQUASTAT  | use surface water% data in 2007 provided by Irrigation report Latvia-AQUASTAT 2016                                                    |
| data collection time      | 2013                                                            | 2007                                          | 2019                                    | 93%                                                                                                                                   |
| Estonia                   | % of area equipped for irrigation by surface water              |                                               |                                         |                                                                                                                                       |
|                           | total area equipped for irrigation                              | area equipped for irrigation by surface water |                                         |                                                                                                                                       |
| value (1000ha)            | 0.458                                                           | 1.17                                          | Irrigation area sheet-Estonia, AQUASTAT | use surface water% data in 2005 provided by Irrigation report Estonia-AQUASTAT 2016                                                   |
| data collection time      | 2010                                                            | 2005                                          | 2019                                    | 86%                                                                                                                                   |
| Estonia                   | % sprinkler irrigation intensity                                |                                               |                                         |                                                                                                                                       |
|                           | Area equipped for full control irrigation: sprinkler irrigation | total agricultural water managed area         |                                         |                                                                                                                                       |
| value (1000ha)            | 3.68                                                            | 0.43                                          | Irrigation area sheet-Estonia, AQUASTAT | no coherent data provided by Irrigation report Estonia-AQUASTAT 2016                                                                  |
| data collection time      | 1995                                                            | 2010                                          | 2019                                    | N/A                                                                                                                                   |
| Lithuania                 | % sprinkler irrigation intensity                                |                                               |                                         |                                                                                                                                       |
|                           | Area equipped for full control irrigation: sprinkler irrigation | total agricultural water managed area         |                                         |                                                                                                                                       |
| value (1000ha)            | 9.247                                                           | 4.49                                          | Irrigation area sheet-Estonia, AQUASTAT | no coherent data provided by Irrigation report Lithuania - AQUASTAT 2016                                                              |
| data collection time      | 1995                                                            | 2010                                          | 2019                                    | N/A                                                                                                                                   |

Table S2. AgNP concentrations measured in surface water in EU scope (from<sup>1</sup>)

| Location | Measured | Distribution | Reference |
|----------|----------|--------------|-----------|
|----------|----------|--------------|-----------|

|                                                                               | time      |                     |   |
|-------------------------------------------------------------------------------|-----------|---------------------|---|
| River, Vltava, Czech Republic<br>Surface water, 1.5 km downstream,<br>Germany | 2017      | Uniform(100,3200)   | 2 |
| River Isar, next to WWTP effluent<br>discharge areas, Germany                 | 2013-2014 | Uniform(0.9,2.3)    | 3 |
| River, next to WWTP effluent<br>discharge areas, Germany                      | 2013-2014 | Uniform(2.0,8.6)    | 3 |
| River, Germany                                                                | 2016      | Uniform(2.42,69.18) | 4 |
| IJssel, Holland                                                               | 2016      | Uniform(1,2)        | 4 |
| Meuse, Holland                                                                | 2018      | Uniform(0.3,2.5)    | 5 |
| Pre-alpine lakes, Germany                                                     | 2018      | Uniform(0.3,6.6)    | 5 |
| Wastewater influent, Germany                                                  | -         | Normal(2.35,0.08)   | 4 |
|                                                                               | 2013-2014 | Uniform(10.1,357)   | 3 |

Table S3. Country-specific sludge application and irrigation related parameters

| reference   | 6,7                                                   | 8                                                                  | 9 10                                                     |                                                                                             |                                    |
|-------------|-------------------------------------------------------|--------------------------------------------------------------------|----------------------------------------------------------|---------------------------------------------------------------------------------------------|------------------------------------|
| data form   | legislation limits                                    | database provided<br>calculated data                               | real data                                                | real data                                                                                   | real data<br>calculation           |
| EU28        | maximum sludge<br>application rate (t<br>DW/ha)       | % of area<br>equipped for<br>irrigation by<br>surface water<br>(%) | total<br>agricultural<br>water managed<br>area (1000 ha) | Area<br>equipped for<br>full control<br>irrigation:<br>sprinkler<br>irrigation<br>(1000 ha) | sprinkler<br>percentage<br>(Ir_sp) |
| Austria     | 2.5-10/2 yr                                           | 0.22052927                                                         | 99.76                                                    | 0                                                                                           | 0.00%                              |
| Belgium     | 4/2 yr or 12/3 yr                                     | 0.509384776                                                        | 19.18                                                    | 0                                                                                           | 0.00%                              |
| Bulgaria    | 0                                                     |                                                                    | 115.5                                                    | 23.18833652                                                                                 | 20.08%                             |
| Croatia     | 0                                                     |                                                                    | 29.68                                                    | 1.473024523                                                                                 | 4.96%                              |
| Cyprus      | 0                                                     | 0.580592147                                                        | 38.943                                                   | 1.927305027                                                                                 | 4.95%                              |
| Czechia     | 0                                                     |                                                                    | 45.86                                                    | 13.09265507                                                                                 | 28.55%                             |
| Denmark     | 10/yr                                                 |                                                                    | 299                                                      | 0                                                                                           | 0.00%                              |
| Estonia     | -                                                     | 0.86                                                               | 0.43                                                     | 3.68                                                                                        |                                    |
| Finland     | digestion (<5%)<br>(assume negligible)                | 0.638981391                                                        | 102.1                                                    | 58.78                                                                                       | 57.57%                             |
| France      | -                                                     |                                                                    | 2691                                                     | 2464.416272                                                                                 | 91.58%                             |
| Germany     | 5/3yr                                                 | 0.136457717                                                        | 676.4                                                    | 655.8076401                                                                                 | 96.96%                             |
| Greece      | -                                                     |                                                                    | 1517                                                     | 0                                                                                           | 0.00%                              |
| Hungary     | 0                                                     |                                                                    | 230                                                      | 192.6188786                                                                                 | 83.75%                             |
| Ireland     | 2/yr                                                  | 0.8                                                                | 1.1                                                      | 0                                                                                           | 0.00%                              |
| Italy       | 5 (Collivignarelli et al.<br>2019; EC, 2011<br>PART1) | 0.631910766                                                        | 4124                                                     | 1591                                                                                        | 38.58%                             |
| Latvia      | -                                                     | 0.93                                                               | 0.672                                                    | 0                                                                                           | 0.00%                              |
| Lithuania   | 0                                                     |                                                                    | 4.49                                                     | 9.247                                                                                       |                                    |
| Luxembourg  | 3/yr                                                  |                                                                    | 0                                                        | 0                                                                                           |                                    |
| Malta       | 0                                                     | 0.003047619                                                        | 4.2                                                      | 0.825688073                                                                                 | 19.66%                             |
| Netherlands | 2-4/yr                                                |                                                                    | 522.6                                                    | 0                                                                                           | 0.00%                              |
| Poland      | -                                                     | 0.898512686                                                        | 75.81                                                    | 3.276145203                                                                                 | 4.32%                              |
| Portugal    | 6/yr                                                  | 0.650237313                                                        | 547.8                                                    | 168.6                                                                                       | 30.78%                             |
| Romania     | 0                                                     |                                                                    | 334.7                                                    | 99.23600265                                                                                 | 29.65%                             |
| Slovakia    | 0                                                     |                                                                    | 99.64                                                    | 0                                                                                           | 0.00%                              |

|                         |                |                          |       |             |                    |
|-------------------------|----------------|--------------------------|-------|-------------|--------------------|
| Slovenia                | 0              |                          | 7.604 | 5.267       | 69.27%             |
| Spain                   | -              |                          | 3681  | 0           | 0.00%              |
| Sweden                  | -              | 0.880025526              | 156.7 | 0           | 0.00%              |
| United Kingdom          | -              |                          | 207.6 | 95.60526316 | 46.05%             |
| <b>Fit distribution</b> | Uniform (0,10) | Triangular (0,0.89851,1) |       |             | Triangular (0,0,1) |

Table S4. Calculation of crop-specific irrigation needs out of total water needs

| Area    | Crop             | Year | Area harvested (ha) <sup>11</sup> | Harvested irrigated area (1000 ha) <sup>12</sup> | Percentage of irrigation need out of total water needs |
|---------|------------------|------|-----------------------------------|--------------------------------------------------|--------------------------------------------------------|
| Ireland | Wheat            | 2017 | 67047                             | 0                                                | 0.00                                                   |
| Ireland | Root vegetables  | 2017 | 0                                 | 0                                                | 0.00                                                   |
| Ireland | leafy vegetables | 2017 | 5722                              | 0.5                                              | 0.09                                                   |
| Europe  | Wheat            | 2017 | 61879579                          | 478.95                                           | 0.01                                                   |
| Europe  | Root vegetables  | 2017 | 11604                             | 7.377                                            | 0.64                                                   |
| Europe  | leafy vegetables | 2017 | 3619763                           | 956.172                                          | 0.26                                                   |

Table S5. Calculations of bioaccumulation factors for crops to AgNPs through root or leafy exposure

| symbol   | crop (root exposure) | exposed AgNP concentration | unit                     | Ag concentration in edible parts | unit       | reference | BF                           |
|----------|----------------------|----------------------------|--------------------------|----------------------------------|------------|-----------|------------------------------|
|          | Mustard              | 108                        | mg/L (Hoagland solution) | 30                               | ug/ml w.w. | 13        | 0.28                         |
|          | silverbeet (chard)   | 324                        | mg/L (soil colloid)      | 42                               |            |           | 0.13                         |
|          | spinach              | 70                         | mg/kg                    | 7                                |            | 14        | 0.10                         |
|          | rocket               | 70                         | mg/kg                    | 3.65                             |            | 14        | 0.05                         |
|          | lettuce              | 70                         | mg/kg                    | 0.25                             | mg/kg d.w. | 14        | 0.00                         |
|          | lettuce              | 0.1                        |                          |                                  |            | 15        | 0.55                         |
|          |                      | 0.5                        |                          |                                  |            |           | 0.64                         |
|          |                      | 1                          |                          |                                  |            |           | 0.61                         |
| BF_lv_s  |                      |                            |                          |                                  |            |           | Triangular(0,0.0035714,0.64) |
|          | Radish Sprouts       | 125                        | mg/L                     | 114                              | mg/kg d.w. | 16        | 0.91                         |
|          |                      | 250                        | mg/L                     | 204                              |            |           | 0.82                         |
|          |                      | 500                        | mg/L                     | 900                              |            |           |                              |
| BF_rv3_s |                      |                            |                          |                                  |            |           | Uniform(0.82,1.80)           |
| BF_rv2_s | leek                 | 70                         | mg/kg                    | 3.65                             | mg/kg d.w. | 14        | 0.05                         |
|          | carrot               | 70                         | mg/kg                    | 7                                | mg/kg d.w. | 14        | 0.10                         |
|          | beetroot             | 70                         | mg/kg                    | 3.65                             |            | 14        | 0.05                         |
| BF_rv1_s |                      |                            |                          |                                  |            |           | Uniform(0.05,0.1)            |
| BF_w_s   | wheat                | 20                         | mg/kg                    | 0.02                             | mg/kg d.w. | 17        | 0.001                        |
| symbol   | foliar exposure      | exposed AgNP concentration | unit                     | Ag concentration in edible parts | unit       | reference | BF                           |

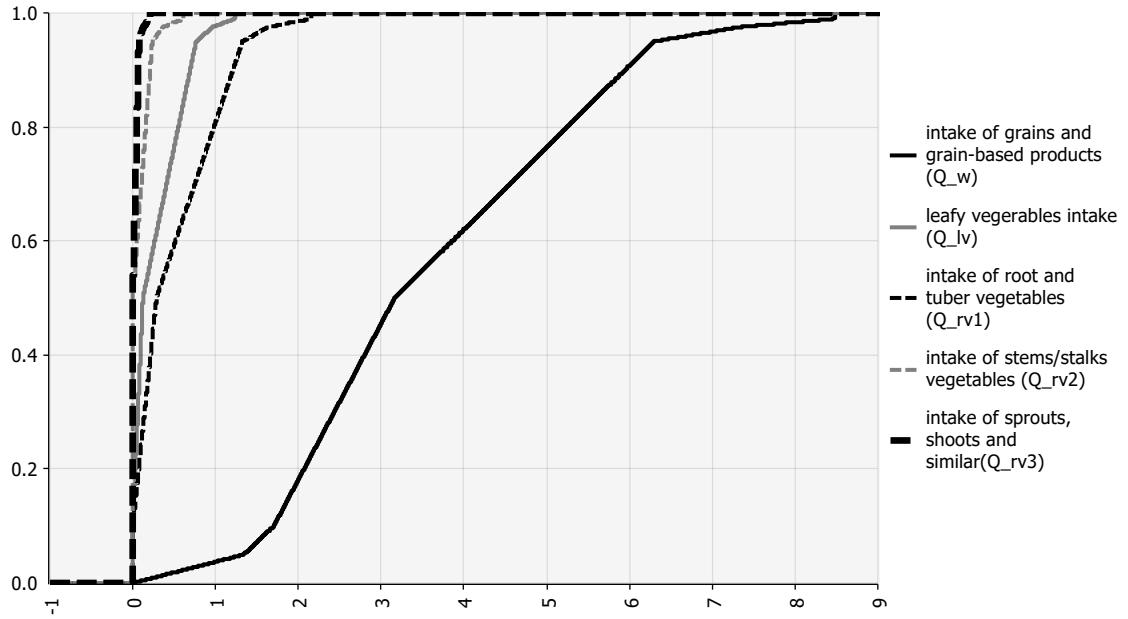

Fig. S1. Cumulative distributions fitted for crops' intake data in Ireland

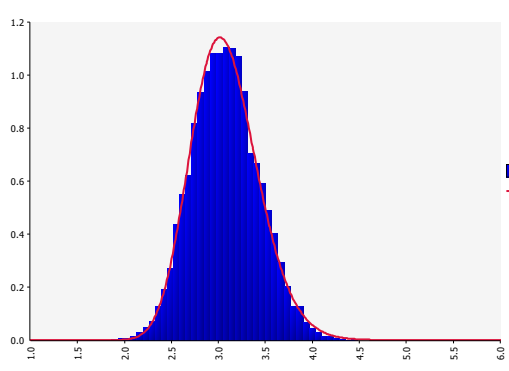

(a)

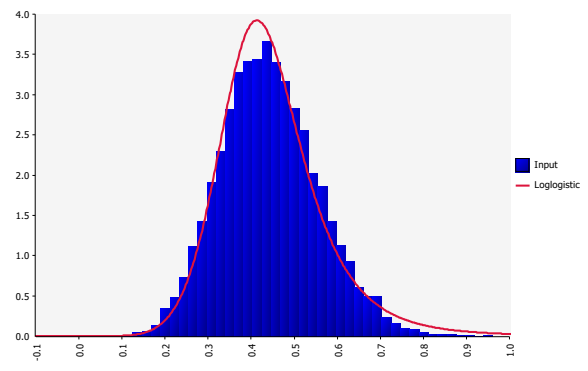

(b)

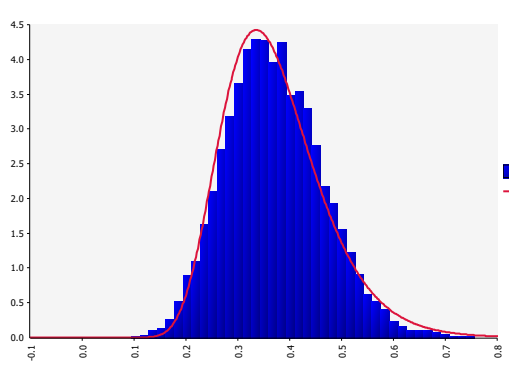

(c)

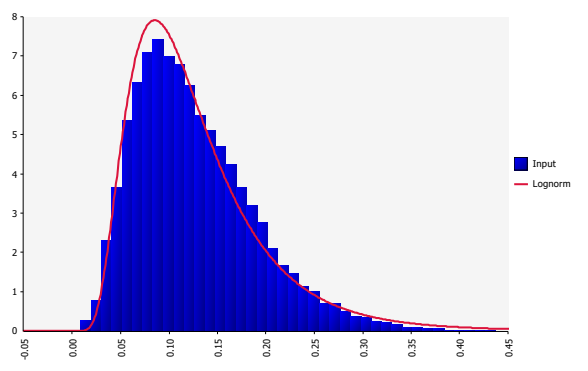

(d)

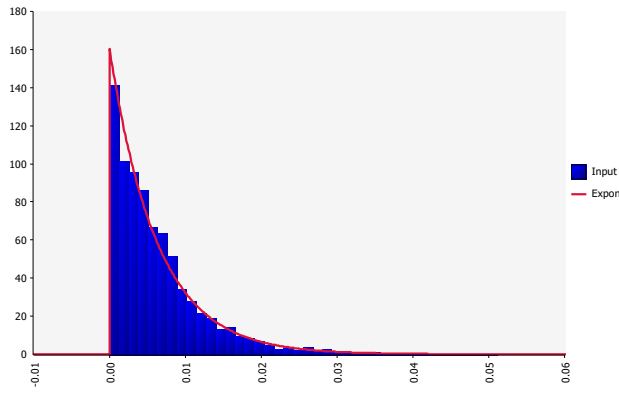

(e)

Fig. S2. Simulations and the best fit distributions of crops' intake data in EU average for (a) wheat and products, (b) leafy vegetables, (c) root and tuber vegetables, (d) stems/stalks vegetables, and (e) sprouts, shoots and similar

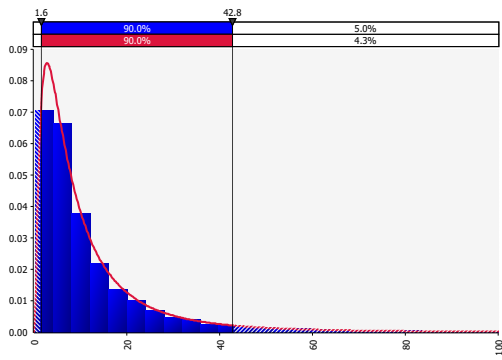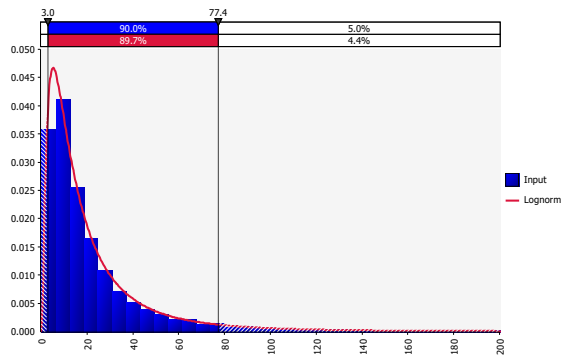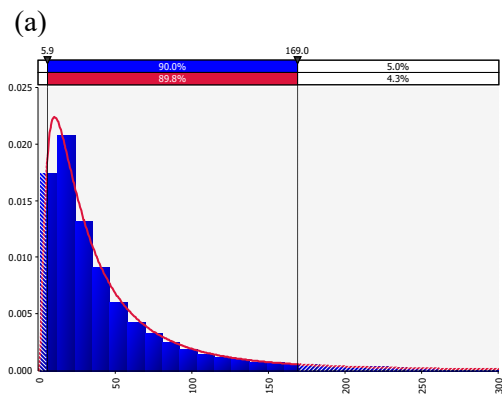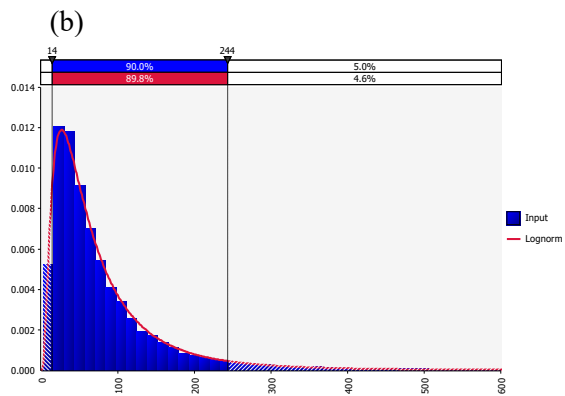

(c)

(d)

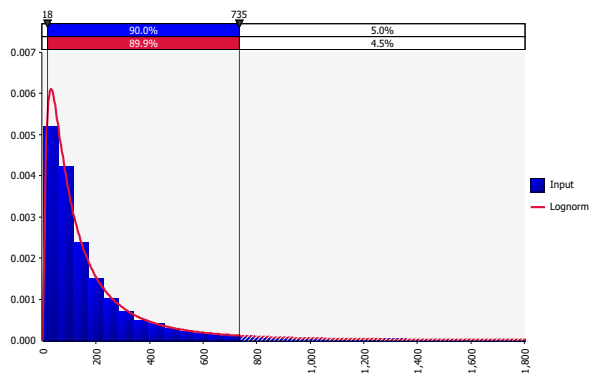

(c)

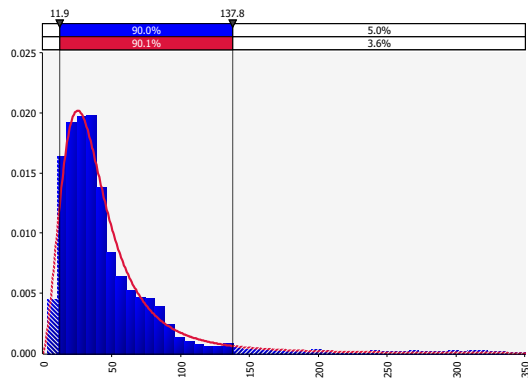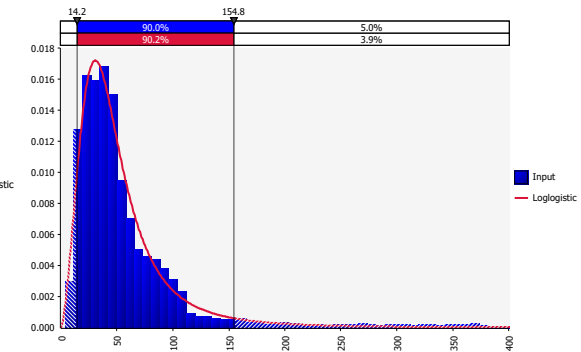

(f)

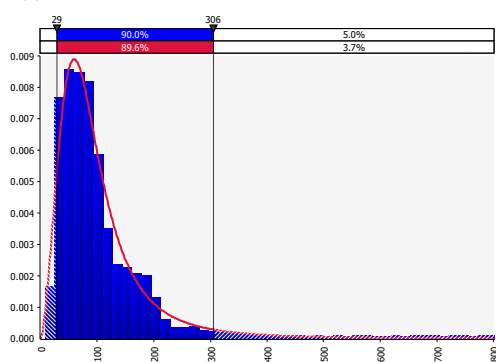

(g)

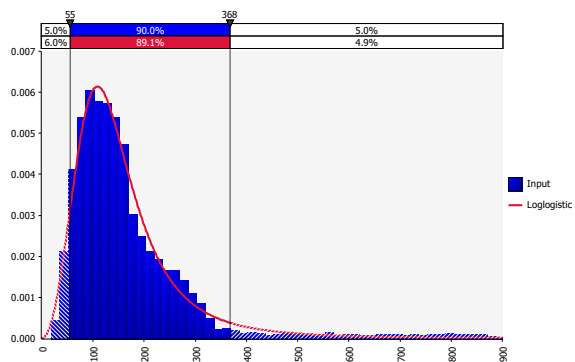

(h)

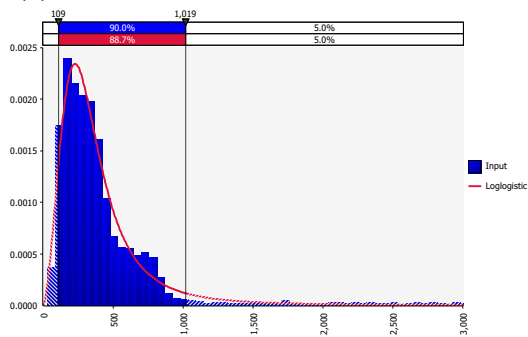

(i)

(j)

Fig. S3. The best-fit distributions for annual AgNP concentrations ( $C_{sl}$ ) in Europe in (a) 2005, (b) 2007, (c) 2010, (d) 2012, (e) 2020; and in Ireland in (f) 2005, (g) 2007, (h) 2010, (i) 2012, (j) 2020

## References

- 1 J. Zhao, M. Lin, Z. Wang, X. Cao and B. Xing, Engineered nanomaterials in the environment: Are they safe?, *Crit. Rev. Environ. Sci. Technol.*, 2020, 1–36.
- 2 M. Loula, A. Kaňa, R. Koplík, J. Hanuš, M. Vosmanská and O. Mestek, Analysis of Silver Nanoparticles Using Single-Particle Inductively Coupled Plasma–Mass Spectrometry (ICP-MS): Parameters Affecting the Quality of Results, *Anal. Lett.*, 2019, **52**, 288–307.
- 3 L. Li, M. Stoiber, A. Wimmer, Z. Xu, C. Lindenblatt, B. Helmreich and M. Schuster, To What Extent Can Full-Scale Wastewater Treatment Plant Effluent Influence the Occurrence of Silver-Based Nanoparticles in Surface Waters?, *Environ. Sci. Technol.*, 2016, **50**, 6327–6333.
- 4 A. Wimmer, A. A. Markus and M. Schuster, Silver Nanoparticle Levels in River Water: Real Environmental Measurements and Modeling Approaches - A Comparative Study, *Environ. Sci. Technol. Lett.*, 2019, **6**, 353–358.
- 5 R. J. B. Peters, G. van Bommel, N. B. L. Milani, G. C. T. den Hertog, A. K. Undas, M. van der Lee and H. Bouwmeester, Detection of nanoparticles in Dutch surface waters, *Sci. Total Environ.*, 2018, **621**, 210–218.
- 6 European Commission, Disposal and Recycling Routes for Sewage Sludge Part 1—Sludge Use Acceptance Report, 2001.
- 7 M. C. Collivignarelli, A. Abbà, A. Frattarola, M. C. Miino, S. Padovani, I. Katsoyiannis and V. Torretta, Legislation for the Reuse of Biosolids on Agricultural Land in Europe: Overview, *Sustainability*, 2019, **11**, 1–22.
- 8 FAO, % of area equipped for irrigation by surface water- AQUASTAT database, % of area equipped for irrigation by surface water- AQUASTAT database, <http://www.fao.org/aquastat/statistics/query/index.html?lang=en>, (accessed 12 March 2021).
- 9 FAO, total agricultural water managed area (1000ha)- AQUASTAT database, total agricultural water managed area (1000ha)- AQUASTAT database, <http://www.fao.org/aquastat/statistics/query/index.html?lang=en>, (accessed 12 March 2021).
- 10 FAO, Area equipped for full control irrigation: sprinkler irrigation (1000 ha)- AQUASTAT database, Area equipped for full control irrigation: sprinkler irrigation (1000 ha)- AQUASTAT database, <http://www.fao.org/aquastat/statistics/query/index.html?lang=en>, (accessed 1 March 2021).
- 11 FAO, FAOSTAT\_Crop statistics, FAOSTAT\_Crop statistics, <http://www.fao.org/faostat/en/#data/QC>, (accessed 8 June 2021).
- 12 FAO, Harvested irrigated area (1000 ha)- AQUASTAT database, Harvested irrigated area (1000 ha)- AQUASTAT database, <http://www.fao.org/aquastat/statistics/query/index.html?lang=en>, (accessed 16 March 2021).
- 13 K. Vishwakarma, Shweta, N. Upadhyay, J. Singh, S. Liu, V. P. Singh, S. M. Prasad, D. K. Chauhan, D. K. Tripathi and S. Sharma, Differential phytotoxic impact of plant mediated silver nanoparticles (AgNPs) and silver nitrate (AgNO<sub>3</sub>) on Brassica sp., *Front. Plant Sci.*, , DOI:10.3389/fpls.2017.01501.
- 14 N. Saleeb, R. Gooneratne, J. Cavanagh, C. Bunt, A. K. M. M. Hossain, S. Gaw and B. Robinson, The Mobility of Silver Nanoparticles and Silver Ions in the Soil-Plant System, *J. Environ. Qual.*, 2019, **48**, 1835–1841.
- 15 J. Wu, G. Wang, M. G. Vijver, T. Bosker and W. J. G. M. Peijnenburg, Foliar versus root exposure of AgNPs to lettuce: Phytotoxicity, antioxidant responses and internal translocation, *Environ. Pollut.*, 2020, **261**, 114117.

- 16 N. Zuverza-Mena, R. Armendariz, J. R. Peralta-Videa and J. L. Gardea-Torresdey, Effects of Silver Nanoparticles on Radish Sprouts: Root Growth Reduction and Modifications in the Nutritional Value, *Front. Plant Sci.*, 2016, **7**, 90.
- 17 J. Yang, F. Jiang, C. Ma, Y. Rui, M. Rui, M. Adeel, W. Cao and B. Xing, Alteration of Crop Yield and Quality of Wheat upon Exposure to Silver Nanoparticles in a Life Cycle Study, *J. Agric. Food Chem.*, 2018, **66**, 2589–2597.
- 18 M. Li, H. L. Liu, F. Dang, H. Hintelmann, B. Yin and D. Zhou, Alteration of Crop Yield and Quality of Three Vegetables upon Exposure to Silver Nanoparticles in Sludge-Amended Soil, *ACS Sustain. Chem. Eng.*, 2020, **8**, 2472–2480.
